# Supplementary material for: Threonyl-tRNA synthetase overexpression correlates with angiogenic markers and progression of human ovarian cancer
Source: BMC Cancer. 2014 Aug 27;14:620. doi: 10.1186/1471-2407-14-620 (PMC4155084; doi:10.1186/1471-2407-14-620)
Supplement: Supplementary file 1 — Additional file 1: Ovarian Cancer Patient Information. (PDF 13 KB) [file 12885_2014_4804_MOESM1_ESM.pdf]

## Additional File 1: Ovarian Cancer Patient Information

**Table S1A:** Ovarian Cancer Patient Group:

Tumor Samples

| Patients                               | Control   | Study     |
|----------------------------------------|-----------|-----------|
| Number                                 | 12        | 70        |
| Age Range (yr)                         | 28-67     | 39-74     |
| Pathology                              |           |           |
| <b>Benign Conditions</b>               | <b>12</b> |           |
| <b>Papillary Serous Adenocarcinoma</b> |           | <b>59</b> |
| Stage I-II                             |           | 6         |
| Stage III                              |           | 39        |
| Stage IV                               |           | 14        |
| <b>Endometrioid Adenocarcinoma</b>     |           | <b>7</b>  |
| Stage I-II                             |           | 3         |
| Stage III                              |           | 4         |
| Stage IV                               |           | 0         |
| <b>Clear Cell Adenocarcinoma</b>       |           | <b>4</b>  |
| Stage I-II                             |           | 3         |
| Stage III                              |           | 1         |
| Stage IV                               |           | 0         |

**Table S1B:** Ovarian Cancer Patient Group:

Serum Samples Subset

| Patients                               | Control  | Study     |
|----------------------------------------|----------|-----------|
| Number                                 | 6        | 31        |
| Age Range (yr)                         | 49-59    | 39-74     |
| Pathology                              |          |           |
| <b>Benign Conditions</b>               | <b>6</b> |           |
| <b>Papillary Serous Adenocarcinoma</b> |          | <b>25</b> |
| Stage I-II                             |          | 4         |
| Stage III                              |          | 16        |
| Stage IV                               |          | 5         |
| <b>Endometrioid Adenocarcinoma</b>     |          | <b>3</b>  |
| Stage I-II                             |          | 1         |
| Stage III                              |          | 2         |
| Stage IV                               |          | 0         |
| <b>Clear Cell Adenocarcinoma</b>       |          | <b>3</b>  |
| Stage I-II                             |          | 2         |
| Stage III                              |          | 1         |
| Stage IV                               |          | 0         |
